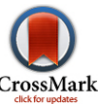

# Phylogenomic Reconstruction Indicates Mitochondrial Ancestor Was an Energy Parasite

Zhang Wang, Martin Wu\*

Department of Biology, University of Virginia, Charlottesville, Virginia, United States of America

## Abstract

Reconstruction of mitochondrial ancestor has great impact on our understanding of the origin of mitochondria. Previous studies have largely focused on reconstructing the last common ancestor of all contemporary mitochondria (proto-mitochondria), but not on the more informative pre-mitochondria (the last common ancestor of mitochondria and their alphaproteobacterial sister clade). Using a phylogenomic approach and leveraging on the increased taxonomic sampling of alphaproteobacterial and eukaryotic genomes, we reconstructed the metabolisms of both proto-mitochondria and pre-mitochondria. Our reconstruction depicts a more streamlined proto-mitochondrion than these predicted by previous studies, and revealed several novel insights into the mitochondria-derived eukaryotic metabolisms including the lipid metabolism. Most strikingly, pre-mitochondrion was predicted to possess a plastid/parasite type of ATP/ADP translocase that imports ATP from the host, which posits pre-mitochondrion as an energy parasite that directly contrasts with the current role of mitochondria as the cell's energy producer. In addition, pre-mitochondrion was predicted to encode a large number of flagellar genes and several cytochrome oxidases functioning under low oxygen level, strongly supporting the previous finding that the mitochondrial ancestor was likely motile and capable of oxidative phosphorylation under microoxic condition.

**Citation:** Wang Z, Wu M (2014) Phylogenomic Reconstruction Indicates Mitochondrial Ancestor Was an Energy Parasite. PLoS ONE 9(10): e110685. doi:10.1371/journal.pone.0110685

**Editor:** Frank Voncken, University of Hull, United Kingdom

**Received:** July 14, 2014; **Accepted:** September 22, 2014; **Published:** October 15, 2014

**Copyright:** © 2014 Wang, Wu. This is an open-access article distributed under the terms of the Creative Commons Attribution License, which permits unrestricted use, distribution, and reproduction in any medium, provided the original author and source are credited.

**Data Availability:** The authors confirm that all data underlying the findings are fully available without restriction. All relevant data are within the paper and its Supporting Information files. The genome sequences have been deposited at DDBJ/EMBL/GenBank as follows: endosymbiont of *acanthamoeba* UW8 (CP004403), *Candidatus Caedibacter acanthamoebae* (CP008936-CP008940), *Candidatus Paracaedibacter acanthamoebae* (CP008941-CP008942), *Candidatus Paracaedibacter symbiosus* (JQAK00000000) and NHP bacterium (JQAJ00000000).

**Funding:** This research was funded by an award from Thomas F. & Kate Miller Jeffress Memorial Trust to MW. The funder had no role in study design, data collection and analysis, decision to publish, or preparation of the manuscript.

**Competing Interests:** The authors have declared that no competing interests exist.

\* Email: mw4yv@virginia.edu

## Introduction

Mitochondria are eukaryotic organelles with a bacterial origin. Known as the endosymbiotic theory, it is now widely accepted that mitochondria originated once from an alphaproteobacterium probably two billion years ago [1]. However, it remains unclear what constituted the initial endosymbiosis between the alphaproteobacterium and its host [2,3,4]. Specifically, what was the role played by the mitochondrial ancestor that initiated the endosymbiosis? Were mitochondria originated under oxic, microoxic, or anoxic condition? Did mitochondria arise at the same time as, or subsequent to, the appearance of nucleus? What was the driving force behind the initial symbiosis [4,5]? Several hypotheses have been proposed to account for circumstances of the founding endosymbiotic events [4,6,7,8]. The “hydrogen hypothesis” proposes the metabolic syntrophy between a H<sub>2</sub>-producing alphaproteobacterium and a H<sub>2</sub>-dependent archaeon as the driving force behind the endosymbiosis [4]. This hypothesis allows the possibility of a simultaneous origination of mitochondrion and nucleus, with the same alphaproteobacterium also contributing to the rise of nucleus by fusing its genome with the host genome [3]. Therefore, the “hydrogen hypothesis” directly challenges the traditional serial endosymbiosis model in which the host is posited to be a full-fledged, nucleus-containing (but amitochondriate)

eukaryote. In contrast, the “oxygen scavenger” hypothesis proposes that the removal of the toxic oxygen by the alphaproteobacterium from the anaerobic host has driven the initial symbiosis [5]. The circumstances under which the founding events occurred remain highly debated.

Reconstructing the gene complement of mitochondrial ancestor can shine light on the origin of mitochondria. It will help us better understand the timing of its signature reductive evolution. More importantly, reconstruction of its metabolism will help elucidate the driving force of the endosymbiosis by testing the alternative hypotheses. For example, whether the initial endosymbiotic condition was aerobic or anaerobic is a key yet debated point among different hypotheses [4,5]. The hydrogen hypothesis supports anaerobic syntrophy whereas the oxygen scavenger hypothesis supports aerobic mutualism. A recent study predicted the presence of both flagella and a cytochrome *cbb3* oxidase in the mitochondrial ancestor and suggested that the mitochondrial ancestor was motile and capable of oxidative phosphorylation under microoxic condition [9]. However, this prediction was largely based on the analysis of one bacterial genome and needs to be further evaluated.

Although a key to understanding of the origin of mitochondria, mitochondrial ancestor reconstruction faces a multitude of problems. Firstly, there have been extreme genome reduction

and dramatic metabolic turnover during mitochondria's transformation from a bacterium to an organelle. For example, mitochondrion of *Reclinomonas americana*, the least derived mitochondrion recognized so far, encodes only 67 proteins in its genome [10]. Vast majority of genes of the ancestor of mitochondria have been either lost or transferred to the nucleus [3], resulting in the highly reduced genomes of modern mitochondria that only encode proteins functioning in translation and ATP production. To reconstruct the mitochondrial ancestor, these lost genes need to be recovered.

Secondly, a robust phylogenetic framework required for ancestral reconstruction has been lacking. Although mitochondria have been firmly placed within alphaproteobacteria, their exact phylogenetic position is uncertain. Weak phylogenetic signal and serious systematic errors such as long-branch attraction and sequence composition bias have all hampered the effort to pinpoint the origin of mitochondria. Nevertheless, recent phylogenomic studies with increased genomic sampling have started to form a consensus by placing mitochondria in or near the *Rickettsiales* order [2,11,12,13,14].

Previous studies have reconstructed the last common ancestor (LCA) of all mitochondria [15,16]. Although insightful, results from these studies have serious limitations when it comes to understanding the origin of mitochondria. Figure 1 illustrates our point. Assuming the evolution of mitochondria is not reversible, point A represents the LCA of mitochondria and their alphaproteobacterial sister clade (for simplicity, hereafter referred as pre-mitochondria), while point B represents the LCA of all mitochondria (proto-mitochondria). Mitochondria emerged somewhere along the stem between points A and B, i.e., after they split off from alphaproteobacteria but before the divergence of the eukaryotic lineages (point C). All previous studies essentially reconstructed proto-mitochondria by simply pooling mitochondrial genes (including genes that have been transferred to the nucleus). Considering the dramatic transformation after the origin of mitochondria and the massive gene losses associated with this transformation, reconstructing proto-mitochondria would reveal little of what it looked like at the origin of mitochondria and therefore provide limited insights into the initial endosymbiosis event.

In order to understand what was happening at the origin of mitochondria, ideally we should reconstruct the ancestral state at time point C. It is difficult to delineate point C in the tree, however, because the origination event was not associated with any lineage diversification. If point B is an end point for studying the origin of mitochondria, then point A represents a good starting

point. To gain better insights into the origin of mitochondria, it would be imperative for us to reconstruct pre-mitochondria at point A.

## Results and Discussion

### Identifying mitochondria-derived nuclear genes

Recovering mitochondrial genes that were lost to nucleus (hereafter referred as mitochondria-derived nuclear genes) is a prerequisite for mitochondrial ancestor reconstruction. Previous studies were based on a rather limited availability of bacterial and eukaryotic genomes at the time of their studies [15,16]. Leveraging on a substantially increased representation of eukaryotic and alphaproteobacterial genomes, we performed a phylogenomic analysis to systematically identify mitochondria-derived nuclear genes. Eukaryotic genes with a top mitochondria/alphaproteobacteria BLAST hit were first clustered into gene families. A phylogenetic tree was reconstructed for each family and nuclear genes that clustered with alphaproteobacteria in the trees were identified as mitochondria-derived. Starting with 427,186 genes from 30 eukaryotic genomes representing a broad range of phylogenetic diversity, we identified 4,459 genes belonging to 394 families as mitochondria-derived nuclear genes. To eliminate recent, lineage-specific gene transfers between alphaproteobacteria and eukaryotes (e.g., between *Trichoplax adhaerens* and its rickettsial endosymbiont [17]), gene families were required to be present in at least two alphaproteobacterial and two eukaryotic lineages.

We estimated the specificity and sensitivity of our method following the procedure of [16]. For the false positive rate, we used the phylum of *Deinococcus/Thermus*, which has no close relationship with eukaryotic lineages, as a benchmark. Of all the 427,186 eukaryotic sequences we screened, only 278 sequences were clustered with *Deinococcus/Thermus* in the gene trees (false positive rate 0.07%), indicating our procedure has a very high specificity. To estimate the false negative rate, we used *Reclinomonas americana*, the hitherto least derived mitochondrial genome as the positive control. Considering that some of the *R. americana* mitochondrial genes have diverged too far to reliably identify their homologs, we used a subset of 50 *R. americana* mitochondrial genes that were present in at least 2 other mitochondrial genomes. 46 out of 50 genes were recovered by our procedure (false negative rate 8%), indicating that our procedure is also very sensitive.

### Reconstructing the metabolism of proto-mitochondria

The 394 mitochondria-derived nuclear genes are presumably all present in proto-mitochondria. To reconstruct the metabolism of proto-mitochondria, we assigned 394 families to Clusters of Orthologous Groups (COGs) [18] and mapped them onto the Kyoto Encyclopedia of Genes and Genomes (KEGG) pathways [19] (Figure 2, Table S1). Pathways including pyruvate metabolism, TCA cycle, electron transport and ribosomal biogenesis, as well as fatty acids biosynthesis, beta-oxidation, branched-chain amino acids degradation (Leucine, Valine, Isoleucine) and the biosynthesis of ubiquinone, biotin and one carbon unit pool, were almost completely recovered, all of which are functional in modern mitochondria. Conversely, functional categories such as DNA replication and transcription were largely absent in our reconstructed metabolism, and the heterotrophic carbohydrate metabolisms such as glycolysis and pentose phosphate pathway were entirely missing. Therefore, our reconstruction depicts streamlined proto-mitochondria highly similar to modern mitochondria, while Gabaldon et al. study suggests an ancestor with more diverse functions (Figure 3) [16].

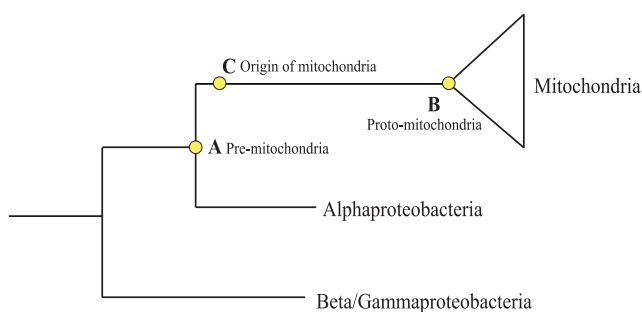

**Figure 1. Key time points in mitochondria evolution.** Time point A represents pre-mitochondria, the last common ancestor of mitochondria and alphaproteobacteria. Time point B represents proto-mitochondria, the last common ancestor of all contemporary mitochondria. Time point C represents the origin of mitochondria. doi:10.1371/journal.pone.0110685.g001



Compared to Gabaldon et al. study, our analysis is more sensitive. This is evident by the fact that despite reconstructing much leaner proto-mitochondria (our 394 vs. Gabaldon's 842 gene families), we were able to fill many of the gaps in well-characterized mitochondrial pathways that were left open in Gabaldon's reconstruction. For example, in the pyruvate metabolism and TCA cycle, we identified a pyruvate dehydrogenase E3 subunit (*lpdA/pdhD*, COG1249), a succinyl-CoA synthetase (*sucD*, COG0074) and a succinate dehydrogenase (*sdh2*, COG0479), which are essential for the pathways but were all missing in Gabaldon's reconstruction. Similarly for ATP synthesis, we added one F0F1-type ATP synthase subunit (*atpC*, COG0355), 3 NADH dehydrogenases (*nuoB*, COG0377; *nuoM*, COG1008; *nuoL*, COG1009) and four cytochrome c components (*fbcC*, COG2857; *cyb561*, COG3038; COG3474; *cycM*, COG5274), completing a functional electron transport chain. For the assembly of iron-sulfur cluster, we added *iscU* (COG0822) and *iscA* (COG0820), two critical scaffold proteins upon which the cluster is assembled and transferred. In terms of the translation machinery, we identified 19 additional ribosomal proteins, along with 8 translation factors (*IF-2*, COG0532; *EF-P*, COG0231 and 6 GTPase (COG0012, COG0206, COG0050, COG2262, COG0218, COG1159)) and 3 aminoacyl-tRNA synthetases (COG0124, COG0162, COG0180). Also, we added a *COQ3* (COG2227) enzyme involved in the ubiquinone biosynthesis, essentially recovering a fully functional *de novo* ubiquinone biosynthesis pathway. In the biotin metabolism, we added a biotin-protein ligase (*birA*, COG4285), the key enzyme that connects the biotin metabolism with fatty acid biosynthesis.

Our reconstruction also has higher specificity. Of the 156 gene families we identified that are present in human nuclear genome, 104 (66.7%) families have been identified in the human mitochondrial proteome, compared with 121 out of 355 (34.1%) families in Gabaldon et al. 2007. Similar results were also observed in yeast and *Arabidopsis* (Table 1). In addition, 56.1% (221 out of 394) of the families identified in our study contain at least one gene with a N-terminal mitochondria targeting signal, compared to 30.7% (258 out of 842) in Gabaldon et al. 2007. Since mitochondria-derived nuclear genes are often recruited back to mitochondria, the higher percentage of mitochondria-localized nuclear gene families in our reconstruction indicates higher specificity of our results.

The reasons for the increased sensitivity and specificity of our results could be at least twofold. First, our phylogenomic analysis used a much larger genome dataset representing a substantially broader range of taxon sampling (1,613 genomes in our study compared to 144 in Gabaldon's 2007 study, Table 1). In particular, many more genomes were included for the *Rickettsiales*

order that has shown close relationship to mitochondria (67 in our study compared to 2 in Gabaldon's 2007 study, Table 1). The phylogenetic diversity of eukaryotic genomes was also greatly increased in our sampling, including 6 novel phyla that had not been sampled in previous studies (Figure S1) [15,16]. Having a broader taxon sampling improved the power of phylogenetic analysis, which enabled us to more reliably trace the evolutionary history of gene families. Second, in Gabaldon study, nuclear genes that clustered with beta- and gammaproteobacteria were also identified as mitochondria-derived nuclear genes. The rationale is to increase the recovery rate of the *R. americana* mitochondrial genes as most of the ribosomal proteins were found to cluster with beta- and gammaproteobacteria in their phylogenetic analyses [16]. However, with increased alphaproteobacterial sampling we only identified two *R. americana* ribosomal proteins with such spurious patterns. Therefore, we think the criterion used in Gabaldon study is unnecessarily relaxed and could increase the false positive rate, leading to an overestimate of the number of mitochondria-derived nuclear genes. For example, genes involved in the pentose phosphate pathway all clustered with gammaproteobacteria or a mixture of gamma- and alphaproteobacteria and were identified as mitochondria-derived in Gabaldon study [16].

### Novel insights into mitochondria-derived eukaryotic metabolisms

Our reconstruction provides several novel insights into mitochondria-derived eukaryotic metabolisms. Of particular interest are a number of genes involved in the eukaryotic lipid metabolism (Table 2). For example, we identified 3 enzymes involved in steroid biosynthesis, including a squalene/phytoene synthase (COG1562), a sterol-C5-desaturase (COG3000) and a 1-deoxy-D-xylulose-5-phosphate synthase (COG1154) as mitochondria-derived, suggesting that mitochondrial ancestor has contributed to eukaryotic steroid biosynthesis. Mitochondrial origin of these enzymes is supported by functional studies. Mitochondria are known to play an essential role in the biosynthesis of steroids by providing sites for the onset of the process [20]. In return, steroids are also critical in maintaining the mitochondrial morphology [21]. Indeed, studies in *C. neoformans* and *T. brucei* indicated that mutants of squalene synthase and sterol desaturase were defective in mitochondrial membrane integrity [22,23].

In addition, we identified a ceramide glycosyltransferase (COG1215) involved in the glycosphingolipids biosynthesis, carrying out ceramides glycosylation reactions. Interestingly, this enzyme is located at the "mitochondria-associated membrane", a specific ER subdomain that bridges between ER and mitochondria [24]. Both glycosphingolipids and ceramides are ubiquitously present as essential membrane components in almost all eukary-

**Table 1.** Comparison between proto-mitochondrial reconstructions of this study and Gabaldon et al. 2007.

|                                                  |                                           | This study | Gabaldon et al. 2007 |
|--------------------------------------------------|-------------------------------------------|------------|----------------------|
| Number of genomes                                | Total                                     | 1613       | 144                  |
|                                                  | Alphaproteobacteria/ <i>Rickettsiales</i> | 171/67     | 11/2                 |
|                                                  | Eukaryotes                                | 30         | 16                   |
| Nuclear gene families in mitochondria proteome   | Human                                     | 66.7%      | 34.1%                |
|                                                  | Yeast                                     | 69.5%      | 46.8%                |
|                                                  | <i>Arabidopsis</i>                        | 63.3%      | 42.6%                |
| Gene families with mitochondrial-targeted signal |                                           | 56.1%      | 30.7%                |

doi:10.1371/journal.pone.0110685.t001

**Table 2.** List of mitochondria-derived nuclear genes involved in eukaryotic lipid metabolism.

| Gene family | COG     | Description                                                    | Lipid metabolized | Cellular localization | Identified in Gabaldon et al. 2007 |
|-------------|---------|----------------------------------------------------------------|-------------------|-----------------------|------------------------------------|
| Group_236   | COG2867 | cyclase/dehydrase                                              | Oligoketide       | Unknown               | N                                  |
| Group_267   | COG1215 | ceramide glucosyltransferase                                   | Sphingolipid      | ER (MAM)              | Y                                  |
| Group_268   | COG1562 | squalene/phytoene synthase                                     | Cholesterol       | ER                    | Y                                  |
| Group_946   | COG1154 | 1-deoxy-D-xylulose-5-phosphate synthase                        | Terpenoid         | ER                    | Y                                  |
| Group_1713  | COG3660 | hypothetical protein                                           | Likely lipid A    | Mitochondria          | Y                                  |
| Group_1971  | COG5597 | sqdD glycosyl transferase                                      | Sulfolipid        | Unknown               | N                                  |
| Group_2416  | COG1044 | lpxD UDP-3-O- 3-hydroxymyristoyl glucosamine N-acyltransferase | Lipid A           | Mitochondria          | N                                  |
| Group_2710  | COG4689 | acetoacetate decarboxylase                                     | Ketone body       | Unknown               | N                                  |
| Group_3620  | COG1043 | lpxA UDP-N-acetylglucosamine acyltransferase                   | Lipid A           | Mitochondria          | N                                  |
| Group_3864  | COG3000 | Sterol C5 desaturase                                           | Sterol            | ER                    | N                                  |
| Group_4604  | COG1519 | kdtA 3-deoxy-D-manno-octulosonic-acid transferase              | Lipid A           | Mitochondria          | Y                                  |
| Group_4794  | COG0763 | lpxB lipid-A-disaccharide synthase                             | Lipid A           | Mitochondria          | N                                  |

doi:10.1371/journal.pone.0110685.t002

otic cells and mitochondria, but are rarely identified in bacteria. Accordingly, the substrates and glycolipid products of the bacterial and eukaryotic glycosyltransferases were thought to be very different [25]. Therefore, the bacterial origin of this gene indicates acquisition of novel function by eukaryotes for synthesizing its own endomembranes and for the crosstalk and lipid trafficking between mitochondria and ER.

Our results also shed light on the mitochondria's contribution to other eukaryotic metabolisms. For instance, we identified several genes (*purD*, COG0151; *purM*, COG0150; *mutT*, COG1051; *pyrD*, COG0167) involved in the *de novo* nucleotide biosynthesis as mitochondria-derived. Both *purD* and *purM* belong to the family of glycinamide ribonucleotide transformylase and catalyze different steps in the *de novo* purine biosynthesis. Mitochondria also contribute to the cytosolic purine biosynthesis by providing formate as the one-carbon unit. Consistently, the entire formate biosynthesis pathway was identified as mitochondria-derived in our results. On the other hand, *pyrD* is a mitochondria-localized protein critical for the pyrimidine biosynthesis [26]. *purD* and *purM* have been previously identified as of mitochondrial origin [13] but were missing in the results of Gabaldon et al. 2007. We also identified a number of genes (*glmS*, COG0449; *wecB*, COG1940; *neuB*, COG2089; *murA*, COG0766) involved in UDP-sugar biosynthesis. UDP-sugar provides essential modifications to various target proteins such as nuclear pore proteins and cytoskeleton components [27]. Thus it is tempting to speculate that these mitochondria-derived genes might participate in controlling the activities of these eukaryote-specific complexes.

### Reconstructing the metabolism of pre-mitochondria

To gain insights into the circumstances that surrounded the initial endosymbiosis event, it is imperative to reconstruct the metabolism of pre-mitochondria. To increase the power of ancestral reconstruction, we sequenced 5 novel lineages of *Rickettsiales* (endosymbiont of acanthamoeba UWC8, *Candidatus* Caedibacter acanthamoebae, *Candidatus* Paracaedibacter acanthamoebae, *Candidatus* Paracaedibacter symbiosus, NHP bacterium) [28,29]. These newly sequenced *Rickettsiales* species, together with 44 other alphaproteobacteria and 6 eukaryote representatives were used to reconstruct a Bayesian tree based on the concatenated protein sequence alignment of 55 mitochondrial

and nuclear marker genes (Figure 4, hereafter referred as species tree). Mitochondria were placed within the *Rickettsiales* order, as a sister clade to the *Rickettsiaceae*, *Anaplasmataceae* and *Candidatus* Midichloriaceae families, all subtended by the *Holosporaceae* family. We note that the 5 newly sequenced *Rickettsiales* are all closely related to mitochondria. In particular, the 4 *Holosporaceae* species, together with previously sequenced *Candidatus* Odyssella thessalonicensis form an outgroup to the LCA of mitochondria and the other *Rickettsiales*, and therefore are extremely informative for reconstructing the ancestral state of pre-mitochondria.

Using tree in Figure 4 and a Bayesian character mapping method, we predicted the gene complement of pre-mitochondria to contain 887 COGs (Table S1). Based on the approximate linear relationships between the number of gene families, the number of genes and the genome size (Figure S2), we estimated the pre-mitochondrial genome to be 1.5–1.6 Mb, with 1100–1300 genes. This is typical of an obligate intracellular bacterium and suggests that genome reduction was well under way before mitochondria split from alphaproteobacteria, i.e., the origin of mitochondria. Figure 5 shows the reconstructed metabolism of pre-mitochondria. Compared to the highly specialized proto-mitochondria, pre-mitochondria were capable of much more diversified metabolisms. In addition to the major pathways involved in translation (13.6%), cell wall, LPS and membrane biogenesis (8.3%), energy production (7.2%), and DNA replication, recombination and repair (7.1%) (Figure 3), they were predicted to possess multiple key metabolic pathways including glycolysis, TCA cycle, pentose phosphate pathway, and fatty acid biosynthesis pathway. Also, pre-mitochondria possessed a large number of genes involved in synthesizing various cofactors, such as riboflavin, folate, biotin and ubiquinone. On the other hand, similar to most *Rickettsiales*, pre-mitochondria possessed a limited number of genes for synthesizing certain amino acids (Glutamine, Leucine, Valine and Isoleucine) from metabolic intermediates, but were deficient in *de novo* amino acid biosynthesis. Therefore pre-mitochondria had to obtain essential amino acids from the host. Accordingly, at least 5 amino acid transporters were predicted in pre-mitochondria.

Pre-mitochondria were predicted to lack most of the genes involved in the *de novo* nucleotide biosynthesis pathway, except for a few genes such as *purD* and *pyrD* that were also present in proto-mitochondria. Among *Rickettsiales*, the *de novo* nucleotide

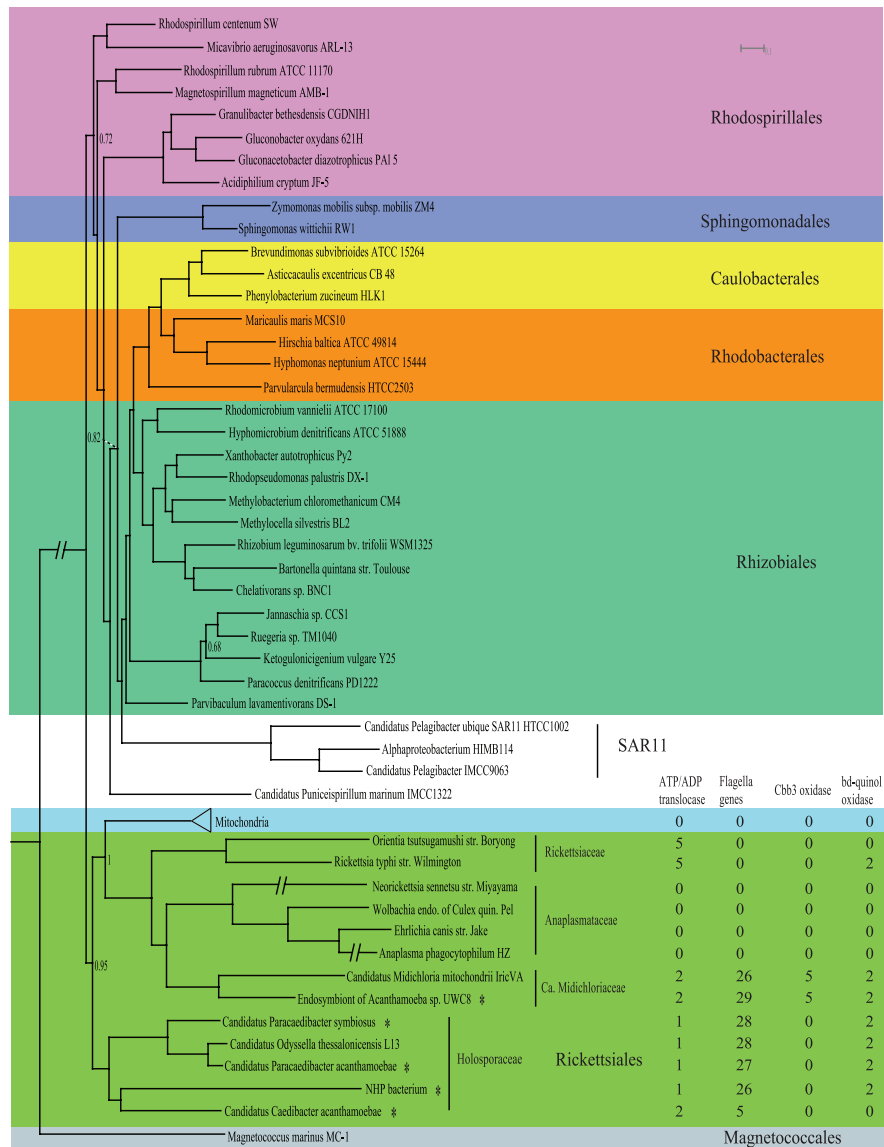

**Figure 4. A species tree of alphaproteobacteria and mitochondria.** The Bayesian consensus tree was based on concatenated protein sequences of 55 mitochondrial and nuclear genes. The tree was rooted using 8 beta- and gamma-proteobacteria as the outgroup, as described in the methods. Asterisks indicate 5 newly sequenced *Rickettsiales* species. The posterior probability support values of the internal nodes are greater than 0.9 unless as indicated in the tree. Branches of several lineages are shortened for display purpose. The distribution of ATP/ADP translocase, flagella genes, cbb3 cytochrome oxidase and bd-quinol cytochrome oxidase in *Rickettsiales* and mitochondria is displayed besides the lineages. doi:10.1371/journal.pone.0110685.g004

biosynthesis pathway is present in the family *Anaplasmataceae* but absent in all other lineages. Hence one interpretation is that the *de novo* nucleotide biosynthesis pathway was gained in *Anaplasmataceae*, as suggested by the Bayesian reconstruction method. Because of their isolated lifestyles and the lack of selection pressures for diversifying due to relatively constant intracellular environment, obligate intracellular bacteria such as *Anaplasmataceae* are thought to have limited opportunities for gene acquisition [30]. Therefore, we think acquiring the entire *de novo* nucleotide biosynthesis pathway, including 12 purine and 6 pyrimidine biosynthesis genes, is extremely unlikely in *Anaplasmataceae*. Instead, we think it is more likely that the nucleotide biosynthesis pathway was present in the ancestor of *Rickettsiales* and mitochondria and was subsequently lost multiple times in both *Rickettsiales* (except for *Anaplasmataceae*) and mitochondria.

### Pre-mitochondrion possessed flagella

A recent study has suggested that the mitochondrial ancestor possessed a flagellum [9]. However, this prediction was based on the presence of 26 flagellar genes in only one *Rickettsiales* species, *Candidatus Midichloria mitochondrii*. Interestingly, most of these 26 flagellar genes were found in 4 out of the 5 *Rickettsiales* endosymbionts we sequenced and also in the recently sequenced endosymbiont *Candidatus Odysella thessalonicensis* (Figure 4). The phylogenetic tree of the concatenated flagellar genes is congruent with the *Rickettsiales* species tree, indicating that flagellar genes have been inherited vertically in *Rickettsiales* species. Consistently, they form syntenic gene clusters (Figure 6). It is therefore not surprising that pre-mitochondria were predicted to possess 25 COGs encoding the core flagellar components including the basal body, motor, hook, rod, filament and export



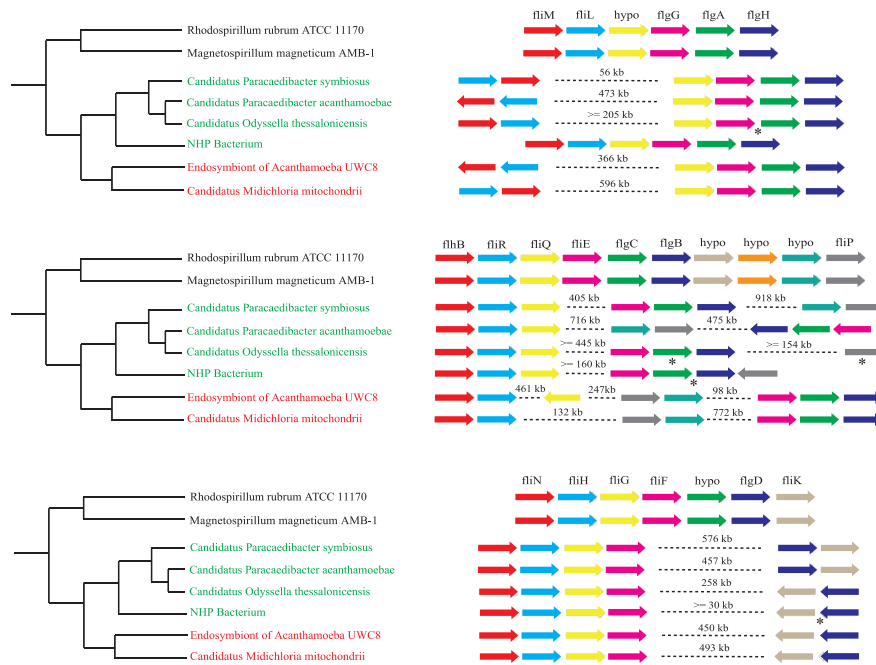

**Figure 6. The synteny of flagellar genes.** *Holosporaceae*, *Candidatus* Midichloriaceae, and free-living alphaproteobacteria representatives are highlighted in green, red and black respectively. Each arrow represents a gene in the cluster. Genome rearrangements are shown as dotted lines between two genes, with the distance between them shown above the lines. Because of the incomplete nature of some genome assemblies, the exact distance between two genes could not be determined. In this case, a minimum distance was estimated as the sum of distances of each gene to the end of the contig it was located in. For the same reason, the orientation of some genes could not be determined (indicated by asterisks below the genes).

doi:10.1371/journal.pone.0110685.g006

the ancestors of *Chlamydiales*, *Rickettsiales* and plastids [35,40] followed by largely vertical inheritance [41]. In consistence, our phylogenetic analysis shows that the gene tree is largely congruent with the species tree of the *Rickettsiales* order (Figure S3), suggesting that this gene has been vertically inherited in *Rickettsiales* and thus was most likely present in their last common ancestor and by inference, pre-mitochondria. If the nucleotide biosynthesis pathway was also present in pre-mitochondria as we have predicted, then this gene most likely functioned as an ATP/ADP exchanger instead of a nucleotide transporter in pre-mitochondria.

Remarkably, the plastid/parasite ATP/ADP translocase is evolutionarily unrelated to and functionally distinct from the ATP/ADP translocase in modern mitochondria, which exhibits an opposite polarity by exporting ATP into the host cytosol [42,43,44]. Therefore, our reconstruction posits pre-mitochondrion as an “energy scavenger” and suggests an energy parasitism between the endosymbiont and its host at the origin of mitochondria, as first proposed by Andersson et al. [5,45]. This is in sharp contrast with the current role of mitochondria as the cell’s energy producer and contradicts the traditional endosymbiotic theory that the symbiosis was driven by the symbiont supplying the host ATP [46,47]. The replacement of plastid/parasite ATP/ADP translocase by mitochondrial ATP/ADP translocase occurred subsequently, resulting in a reverse flow of ATP between mitochondrion and its host. This remarkable transformation in energy metabolism might mark the transition of mitochondria from a parasitic endosymbiont to a mutualistic organelle [48].

A recent systematic survey of bacterial symbiosis has shown that mutualisms can originate either directly from environmental free-living bacteria or from intracellular parasites [49]. A key difference

between these two evolutionary routes is that to initiate symbiosis, free-living bacteria need to offer immediate benefits to the host while intracellular parasitic bacteria do not [50]. Our results suggest that mitochondria most likely originated from an obligate intracellular parasite and not from a free-living bacterium. This has important implications for our understanding of the origin of mitochondria. It implies that at the beginning of the endosymbiosis, the bacterial symbiont provided no benefits whatsoever to the host. Therefore we argue that the benefits proposed by various hypotheses (e.g., oxygen scavenger hypothesis and hydrogen hypothesis) are irrelevant in explaining the establishment of the initial symbiosis. Instead, it might be more appropriate to apply them to explain the transition of mitochondria from a parasite to a mutualistic organelle at a later stage.

## Materials and Methods

### Identification of mitochondria-derived nuclear genes

The phylogenetic distribution of all sequenced eukaryotic genomes was retrieved from GenomeOnline database (GOLD, <http://genomesonline.org/>). 30 eukaryotic genomes representing a broad range of eukaryotic diversity (10 phyla) were selected for identifying the mitochondria-derived nuclear genes (*Allomyces macrogynus*, *Arabidopsis thaliana*, *Batrachochytrium dedrobatidis*, *Caenorhabditis elegans*, *Chlamydomonas reinhardtii*, *Cryptococcus neoformans*, *Dictyostelium discoideum*, *Drosophila melanogaster*, *Encephalitozoon intestinalis*, *Entamoeba histolytica*, *Enterocytozoon bieneusi*, *Giardia lamblia*, *Homo sapiens*, *Leishmania major*, *Micromonas pusilla*, *Monosiga brevicollis*, *Naegleria gruberi*, *Nectria haematococca*, *Nematostella vectensis*, *Nosema ceranae*, *Phytophthora infestans*, *Plasmodium falciparum*, *Saccharomyces cerevisiae*, *Schistosoma mansoni*, *Spizellomyces punctatus*, *Strongy-*



*locentrotus purpuratus*, *Tetrahymena thermophila*, *Thalassiosira pseudonana*, *Trichoplax adhaerens*, *Trypanosoma brucei*).

For every single gene of 30 eukaryotic nuclear genomes, an initial BLASTP search was performed against 2,742 complete bacterial, archaeal, and mitochondrial genomes. A eukaryotic gene was retained for further phylogenetic analysis if its top five hits contained an alphaproteobacterial or mitochondrial sequence (e-value cutoff  $1e^{-4}$ ). All eukaryotic genes passing the initial BLAST search were clustered into families using the Markov Cluster Algorithm [51]. Families that were present in at least two eukaryotic lineages were selected for phylogenetic analysis. For each retained protein family, its homologs from all complete bacterial genomes were retrieved by BLASTP search (e-value cutoff  $1e^{-15}$ ). Protein sequences were aligned using MAFFT [52] and trimmed using ZORRO [53]. Phylogenetic trees were constructed using FastTree 2 [54]. When possible, each individual tree was rooted using three different rooting methods, rooting with Archaea or *Deinococcus* as the outgroup or midpoint rooting. Each of the rooted trees was scanned for a bipartition where eukaryotic genes clustered with alphaproteobacterial or mitochondrial homologs. A partition was retained as one gene family if it contained at least two eukaryotes and two alphaproteobacterial species. Paralogs, if existed in a family, were separated and each was treated as a new family of mitochondria-derived nuclear genes.

### Functional annotation of mitochondria-derived nuclear genes

Mitochondria-derived nuclear genes were classified into Clusters of Orthologous Groups (COGs) by hidden Markov model search using HMMer3 [55]. To reconstruct metabolic pathways, genes were mapped onto Kyoto Encyclopedia of Genes and Genomes (KEGG) database using KEGG Automatic Annotation Server (KAAS) [56] with “bi-directional best hit (BBH)” as the assignment method.

### Genome sequencing, assembly and annotation

4 endosymbionts of acanthamoebae (endosymbiont of acanthamoeba UWC8, *Candidatus* Caedibacter acanthamoebae, *Candidatus* Paracaedibacter acanthamoebae, *Candidatus* Paracaedibacter symbiosus) and one pathogen of shrimp NHP bacterium were sequenced by a combination of 454, Illumina and Pacific Biosciences SMRT sequencing. The genomes were assembled using Newbler 2.5.3, CLCGenomicWorkbench 6.0.1 or Celera assembler 8.2 and closed manually by resolving repeats using paired-end information and comparing assemblies using Mauve [57]. PCR and Sanger sequencing were used to close gaps between contigs when necessary. The genomes have been deposited at DDBJ/EMBL/GenBank as follows: endosymbiont of acanthamoeba UWC8 (CP004403), *Candidatus* Caedibacter acanthamoebae (CP008936-CP008940), *Candidatus* Paracaedibacter acanthamoebae (CP008941-CP008942), *Candidatus* Paracaedibacter symbiosus (JQAK000000000) and NHP bacterium (JQAJ000000000). Protein-coding genes were predicted using the GLIMMER software package [58].

### Alphaproteobacteria and mitochondria species tree

We selected a set of 49 alphaproteobacterial representatives using a tree-based greedy algorithm to maximize their phylogenetic diversity [59]. A set of 6 eukaryotic lineages (*Cryptococcus neoformans*, *Arabidopsis thaliana*, *Nematostella vectensis*, *Spizellomyces punctatus*, *Monosiga brevicollis*, *Phytophthora infestans*) were selected as eukaryotic representatives. Phyla *Alveolata*,

*Amoebozoa*, *Euglenozoa* and *Diplomonadida* were not included because they had extremely long branches and therefore were prone to long branch attraction (LBA).

We selected a set of 26 mitochondria-encoded genes (*cob*, *cox2*, *cox3*, *nad1*, *nad2*, *nad3*, *nad4*, *nad4L*, *nad5*, *nad6*, *nad9*, *rpl2*, *rpl5*, *rpl6*, *rpl16*, *rps1*, *rps2*, *rps3*, *rps4*, *rps7*, *rps8*, *rps11*, *rps12*, *rps13*, *rps14*, *rps19*) and 29 mitochondria-derived nuclear genes (*cox11*, *sdhB*, *sucD*, *petA*, *erpA*, *hesB*, *ybjS*, *nuoC*, *nuoD*, *nuoF*, *nuoG*, *nuoI*, *rpl3*, *grpE*, *groEL*, *dnaK*, *clpB*, *clpP*, *hslV*, *engA*, *gidA*, *trmE*, *AFG1*, *apaG*, *bioC*, *hemN*, *ksgA*, *mraW*, *hypothetical*) as the marker genes for reconstructing the species tree. The list of mitochondria-encoded genes was taken from [13]. Three genes (*atp6*, *atp9*, *atpA*) were excluded from the original list because of their potential involvement in lateral gene transfer [60]. Three other genes (*cox1*, *yeyR*, *yeyU*) were excluded because of the potential paralogy problem. The nuclear genes were selected because they were single-copy genes and were distributed in at least two eukaryotic phyla. Protein sequences of 55 mitochondrial and nuclear marker genes from selected genomes were identified, aligned, trimmed and concatenated using AMPHORA2 [61]. From the concatenated protein sequence alignment, a Bayesian tree was reconstructed using PhyloBayes [62] with the -CAT -GTR options as recommended in the manual. Two independent MCMC chains were run and the chains were considered converged when the maxdiff dropped below 0.3, as suggested in the manual. The trees were sampled every 10 cycles and the beginning one fifth of the trees from each chain were discarded as burn-in. The tree was rooted using 8 beta- and gamma-proteobacteria as outgroup (*Nitrosomonas sp. Is79A3*, *Ralstonia solanacearum GMI1000*, *Dechloromonas aromatica RCB*, *Chromobacterium violaceum ATCC 12472*, *Francisella tularensis subsp. tularensis FSC198*, *Legionella pneumophila str. Lens*, *Escherichia coli str. K-12 substr. MG1655* and *Pseudomonas aeruginosa PA7*). The outgroup species were taken from a previous study [14]. We excluded *Buchnera* because it had a long branch and might cause the LBA artifact.

### Pre-mitochondria ancestral state reconstruction

Using the species tree, pre-mitochondria were reconstructed with a Bayesian character mapping inference algorithm implemented in BayesTraits V2 [63]. The Bayesian method has been shown to be superior to both the parsimony method and maximum likelihood method in accounting for uncertainties in both model parameters and phylogeny [63,64]. The mitochondrial genes were compiled by combining the mitochondria-derived nuclear genes with the mitochondria-encoded genes. Mitochondrial and 148,485 genes of 49 alphaproteobacterial genomes were first assigned to 4,873 COGs by hidden Markov model search using HMMer3 [55]. Genes that could not be assigned to a COG were then clustered into families using the Markov Cluster Algorithm [51], creating 3,210 “expanded COGs”. The presence/absence of each COG in each species was treated as a binary trait and was used for the ancestral state reconstruction. Gamma distribution was adopted as the prior distribution with its parameter estimated from an initial maximum likelihood analysis. The “hyperprior” option was used to reduce the uncertainty in choosing priors in the MCMC. A total number of 1,050,000 iterations were performed, with the first 50,000 cycles discarded as burn-in. The average value of each binary state in the remaining 1,000,000 cycles was then taken as the probability of the presence of each COG in the reconstructed ancestral state.

## Supporting Information

**Figure S1 Overview of mitochondria-derived nuclear genes.** The eukaryotic species tree was reconstructed based on the concatenated 29 ribosomal proteins conserved among all three domains. Within each species, from innermost to outermost are the numbers of 1) nuclear genes, 2) mitochondrial genes, 3) mitochondria-derived nuclear genes, 4) mitochondria-derived nuclear gene families. The heights of the bars were scaled for display purposes. Each color in the tree represents a different eukaryotic phylum. 6 novel phyla that had not been sampled by previous studies were indicated by asterisks. Lineages highlighted in red represent amitochondriate eukaryotes. Branches with dots represent the ones with bootstrap support  $\geq 80$  (100 replicates). (PDF)

**Figure S2 Correlation a) between the number of COGs and the number of genes, and b) between the number of COGs and the genome size of 49 alphaproteobacteria representatives.** In both graphs, the red dots represent pre-mitochondria.

## References

- Lang BF, Gray MW, Burger G (1999) Mitochondrial genome evolution and the origin of eukaryotes. *Annu Rev Genet* 33: 351–397.
- Andersson SG, Zomorodipour A, Andersson JO, Sicheritz-Ponten T, Alsmark UC, et al. (1998) The genome sequence of *Rickettsia prowazekii* and the origin of mitochondria. *Nature* 396: 133–140.
- Gray MW, Burger G, Lang BF (1999) Mitochondrial evolution. *Science* 283: 1476–1481.
- Martin W, Muller M (1998) The hydrogen hypothesis for the first eukaryote. *Nature* 392: 37–41.
- Andersson SG, Karlberg O, Canback B, Kurland CG (2003) On the origin of mitochondria: a genomics perspective. *Philos Trans R Soc Lond B Biol Sci* 358: 165–177; discussion 177–169.
- Embley TM, Martin W (2006) Eukaryotic evolution, changes and challenges. *Nature* 440: 623–630.
- Koonin EV (2010) The origin and early evolution of eukaryotes in the light of phylogenomics. *Genome Biol* 11: 209.
- Andersson SG, Karlberg O, Canback B, Kurland CG (2003) On the origin of mitochondria: a genomics perspective. *Philosophical Transactions of the Royal Society of London Series B, Biological Sciences* 358: 165–177; discussion 177–169.
- Sassera D, Lo N, Epis S, D'Auria G, Montagna M, et al. (2011) Phylogenomic evidence for the presence of a flagellum and cbb(3) oxidase in the free-living mitochondrial ancestor. *Mol Biol Evol* 28: 3285–3296.
- Lang BF, Burger G, O'Kelly CJ, Cedergren R, Golding GB, et al. (1997) An ancestral mitochondrial DNA resembling a eubacterial genome in miniature. *Nature* 387: 493–497.
- Fitzpatrick DA, Creevey CJ, McInerney JO (2006) Genome phylogenies indicate a meaningful alpha-proteobacterial phylogeny and support a grouping of the mitochondria with the Rickettsiales. *Mol Biol Evol* 23: 74–85.
- Williams KP, Sobral BW, Dickerman AW (2007) A robust species tree for the alphaproteobacteria. *J Bacteriol* 189: 4578–4586.
- Wu M, Sun LV, Vamathevan J, Riegler M, Deboy R, et al. (2004) Phylogenomics of the Reproductive Parasite *Wolbachia pipientis* wMel: A Streamlined Genome Overrun by Mobile Genetic Elements. *PLoS Biol* 2: E69.
- Rodriguez-Ezpeleta N, Embley TM (2012) The SAR11 group of alpha-proteobacteria is not related to the origin of mitochondria. *PLoS ONE* 7: e30520.
- Gabalton T, Huynen MA (2003) Reconstruction of the proto-mitochondrial metabolism. *Science* 301: 609.
- Gabalton T, Huynen MA (2007) From endosymbiont to host-controlled organelle: the hijacking of mitochondrial protein synthesis and metabolism. *PLoS Comput Biol* 3: e219.
- Driscoll T, Gillespie JJ, Nordberg EK, Azad AF, Sobral BW (2013) Bacterial DNA sifted from the *Trichoplax adhaerens* (Animalia: Placozoa) genome project reveals a putative rickettsial endosymbiont. *Genome Biol Evol* 5: 621–645.
- Tatusov RL, Galperin MY, Natale DA, Koonin EV (2000) The COG database: a tool for genome-scale analysis of protein functions and evolution. *Nucleic Acids Res* 28: 33–36.
- Kanehisa M, Goto S (2000) KEGG: kyoto encyclopedia of genes and genomes. *Nucleic Acids Res* 28: 27–30.
- Duarte A, Poderoso C, Cooke M, Soria G, Maciel FC, et al. (2012) Mitochondrial Fusion Is Essential for Steroid Biosynthesis. *Plos One* 7.

(PDF)

**Figure S3 A maximum-likelihood tree inferred from amino acid sequences of the ATP/ADP translocase in *Chlamydiales* (blue), *Rickettsiales* (orange), *Bacteroidetes* (yellow) and plastids (green).** The tree was rooted by homologs in Microsporidia (*Encephalitozoon intestinalis*, *Encephalitozoon cuniculi*, *Enterocytozoon bieneusi* and *Nosema ceranae*). Branches of several lineages are shortened for display purpose. Bootstrap values (out of 100 replicates) are above 80 unless as indicated in the tree.

(PDF)

**Table S1 Gene content of proto-mitochondria and pre-mitochondria as COGs.**

(XLSX)

## Author Contributions

Conceived and designed the experiments: MW. Performed the experiments: ZW. Analyzed the data: ZW MW. Contributed to the writing of the manuscript: ZW MW.

- Prince FP, Buttle KF (2004) Mitochondrial structure in steroid-producing cells: three-dimensional reconstruction of human Leydig cell mitochondria by electron microscopic tomography. *Anat Rec A Discov Mol Cell Evol Biol* 278: 454–461.
- Ingavale SS, Chang YC, Lee H, McClelland CM, Leong ML, et al. (2008) Importance of mitochondria in survival of *Cryptococcus neoformans* under low oxygen conditions and tolerance to cobalt chloride. *Plos Pathogens* 4.
- Perez-Moreno G, Sealey-Cardona M, Rodrigues-Poveda C, Gelb MH, Ruiz-Perez LM, et al. (2012) Endogenous sterol biosynthesis is important for mitochondrial function and cell morphology in procyclic forms of *Trypanosoma brucei*. *International Journal for Parasitology* 42: 975–989.
- Ardail D, Popa I, Bodenec J, Louisot P, Schmitt D, et al. (2003) The mitochondria-associated endoplasmic-reticulum subcompartment (MAM fraction) of rat liver contains highly active sphingolipid-specific glycosyltransferases. *Biochem J* 371: 1013–1019.
- Holz G, Leipelt M, Ott C, Zahringer U, Lindner B, et al. (2005) Processive lipid galactosyl/glucosyltransferases from *Agrobacterium tumefaciens* and *Mesorhizobium loti* display multiple specificities. *Glycobiology* 15: 874–886.
- Desler C, Lykke A, Rasmussen IJ (2010) The effect of mitochondrial dysfunction on cytosolic nucleotide metabolism. *J Nucleic Acids* 2010.
- Hanover JA (2001) Glycan-dependent signaling: O-linked N-acetylglucosamine. *FASEB J* 15: 1865–1876.
- Horn M, Fritsche TR, Gautom RK, Schleifer KH, Wagner M (1999) Novel bacterial endosymbionts of *Acanthamoeba* spp. related to the *Paramecium caudatum* symbiont *Caedibacter caryophilus*. *Environ Microbiol* 1: 357–367.
- Fritsche TR, Horn M, Seyedirashiti S, Gautom RK, Schleifer KH, et al. (1999) In situ detection of novel bacterial endosymbionts of *Acanthamoeba* spp. phylogenetically related to members of the order Rickettsiales. *Applied and Environmental Microbiology* 65: 206–212.
- Moreno E (1998) Genome evolution within the alpha Proteobacteria: why do some bacteria not possess plasmids and others exhibit more than one different chromosome? *FEMS Microbiology Reviews* 22: 255–275.
- Liu R, Ochman H (2007) Stepwise formation of the bacterial flagellar system. *Proc Natl Acad Sci U S A* 104: 7116–7121.
- Bradley-Dunlop DJ, Pantoja C, Lightner DV (2004) Development of monoclonal antibodies for detection of necrotizing hepatopancreatitis in penaeid shrimp. *Dis Aquat Organ* 60: 233–240.
- Boscaro V, Schrollhammer M, Benken KA, Krenek S, Szokoli F, et al. (2013) Rediscovering the genus *Lyticum*, multiflagellated symbionts of the order Rickettsiales. *Sci Rep* 3: 3305.
- Vahling CM, Duan Y, Lin H (2010) Characterization of an ATP translocase identified in the destructive plant pathogen "*Candidatus Liberibacter asiaticus*". *Journal of Bacteriology* 192: 834–840.
- Schmitz-Esser S, Linka N, Collingro A, Beier CL, Neuhaus HE, et al. (2004) ATP/ADP translocases: a common feature of obligate intracellular amoebal symbionts related to Chlamydiae and Rickettsiae. *J Bacteriol* 186: 683–691.
- Tjaden J, Winkler HH, Schwoppe C, Van Der Laan M, Mohlmann T, et al. (1999) Two nucleotide transport proteins in *Chlamydia trachomatis*, one for net nucleoside triphosphate uptake and the other for transport of energy. *J Bacteriol* 181: 1196–1202.
- Audia JP, Winkler HH (2006) Study of the five *Rickettsia prowazekii* proteins annotated as ATP/ADP translocases (Tlc): Only Tlc1 transports ATP/ADP, while Tlc4 and Tlc5 transport other ribonucleotides. *J Bacteriol* 188: 6261–6268.

38. Brayton KA, Kappmeyer LS, Herndon DR, Dark MJ, Tibbals DL, et al. (2005) Complete genome sequencing of *Anaplasma marginale* reveals that the surface is skewed to two superfamilies of outer membrane proteins. Proceedings of the National Academy of Sciences of the United States of America 102: 844–849.
39. Mavromatis K, Doyle CK, Lykidis A, Ivanova N, Francino MP, et al. (2006) The genome of the obligately intracellular bacterium *Ehrlichia canis* reveals themes of complex membrane structure and immune evasion strategies. J Bacteriol 188: 4015–4023.
40. Greub G, Raoult D (2003) History of the ADP/ATP-translocase-encoding gene, a parasitism gene transferred from a Chlamydiales ancestor to plants 1 billion years ago. Appl Environ Microbiol 69: 5530–5535.
41. Amiri H, Karlberg O, Andersson SG (2003) Deep origin of plastid/parasite ATP/ADP translocases. Journal of Molecular Evolution 56: 137–150.
42. Andersson SG, Kurland CG (1998) Reductive evolution of resident genomes. Trends in Microbiology 6: 263–268.
43. Wolf YI, Aravind L, Koonin EV (1999) Rickettsiae and Chlamydiae: evidence of horizontal gene transfer and gene exchange. Trends Genet 15: 173–175.
44. Winkler HH, Neuhaus HE (1999) Non-mitochondrial ATP transport. Trends in Biochemical Sciences 24: 64–68.
45. Amiri H, Karlberg O, Andersson SGE (2003) Deep origin of plastid/parasite ATP/ADP translocases. Journal of Molecular Evolution 56: 137–150.
46. John P, Whatley FR (1975) *Paracoccus denitrificans* and the evolutionary origin of the mitochondrion. Nature 254: 495–498.
47. Whatley JM, John P, Whatley FR (1979) From extracellular to intracellular: the establishment of mitochondria and chloroplasts. Proc R Soc Lond B Biol Sci 204: 165–187.
48. Kurland CG, Andersson SGE (2000) Origin and evolution of the mitochondrial proteome. Microbiology and Molecular Biology Reviews 64: 786–+.
49. Sachs JL, Skophammer RG, Regus JU (2011) Evolutionary transitions in bacterial symbiosis. Proc Natl Acad Sci U S A 108 Suppl 2: 10800–10807.
50. Ewald PW (1987) Transmission modes and evolution of the parasitism-mutualism continuum. Annals of the New York Academy of Sciences 503: 295–306.
51. Enright AJ, Van Dongen S, Ouzounis CA (2002) An efficient algorithm for large-scale detection of protein families. Nucleic Acids Res 30: 1575–1584.
52. Katoh K, Misawa K, Kuma K, Miyata T (2002) MAFFT: a novel method for rapid multiple sequence alignment based on fast Fourier transform. Nucleic Acids Res 30: 3059–3066.
53. Wu M, Chatterji S, Eisen JA (2012) Accounting for alignment uncertainty in phylogenomics. PLoS One 7: e30288.
54. Price MN, Dehal PS, Arkin AP (2010) FastTree 2—approximately maximum-likelihood trees for large alignments. PLoS one 5: e9490.
55. Eddy SR (1998) Profile hidden Markov models. Bioinformatics 14: 755–763.
56. Moriya Y, Itoh M, Okuda S, Yoshizawa AC, Kanehisa M (2007) KAAS: an automatic genome annotation and pathway reconstruction server. Nucleic Acids Res 35: W182–185.
57. Darling AE, Mau B, Perna NT (2010) progressiveMauve: multiple genome alignment with gene gain, loss and rearrangement. PLoS One 5: e11147.
58. Delcher AL, Bratke KA, Powers EC, Salzberg SL (2007) Identifying bacterial genes and endosymbiont DNA with Glimmer. Bioinformatics 23: 673–679.
59. Steel M (2005) Phylogenetic diversity and the greedy algorithm. Syst Biol 54: 527–529.
60. Hilario E, Gogarten JP (1993) Horizontal transfer of ATPase genes—the tree of life becomes a net of life. Biosystems 31: 111–119.
61. Wu M, Scott AJ (2012) Phylogenomic analysis of bacterial and archaeal sequences with AMPHORA2. Bioinformatics 28: 1033–1034.
62. Lartillot N, Philippe H (2004) A Bayesian mixture model for across-site heterogeneities in the amino-acid replacement process. Mol Biol Evol 21: 1095–1109.
63. Pagel M, Meade A, Barker D (2004) Bayesian estimation of ancestral character states on phylogenies. Syst Biol 53: 673–684.
64. Vanderpoorten A, Goffinet B (2006) Mapping uncertainty and phylogenetic uncertainty in ancestral character state reconstruction: an example in the moss genus *Brachytheciastrum*. Syst Biol 55: 957–971.
