# Supplementary material for: Phylogenomic Reconstruction Indicates Mitochondrial Ancestor Was an Energy Parasite
Source: PubMed Central journal article supplement (PMC4198247; doi:10.1371/journal.pone.0110685), 2014-10-15

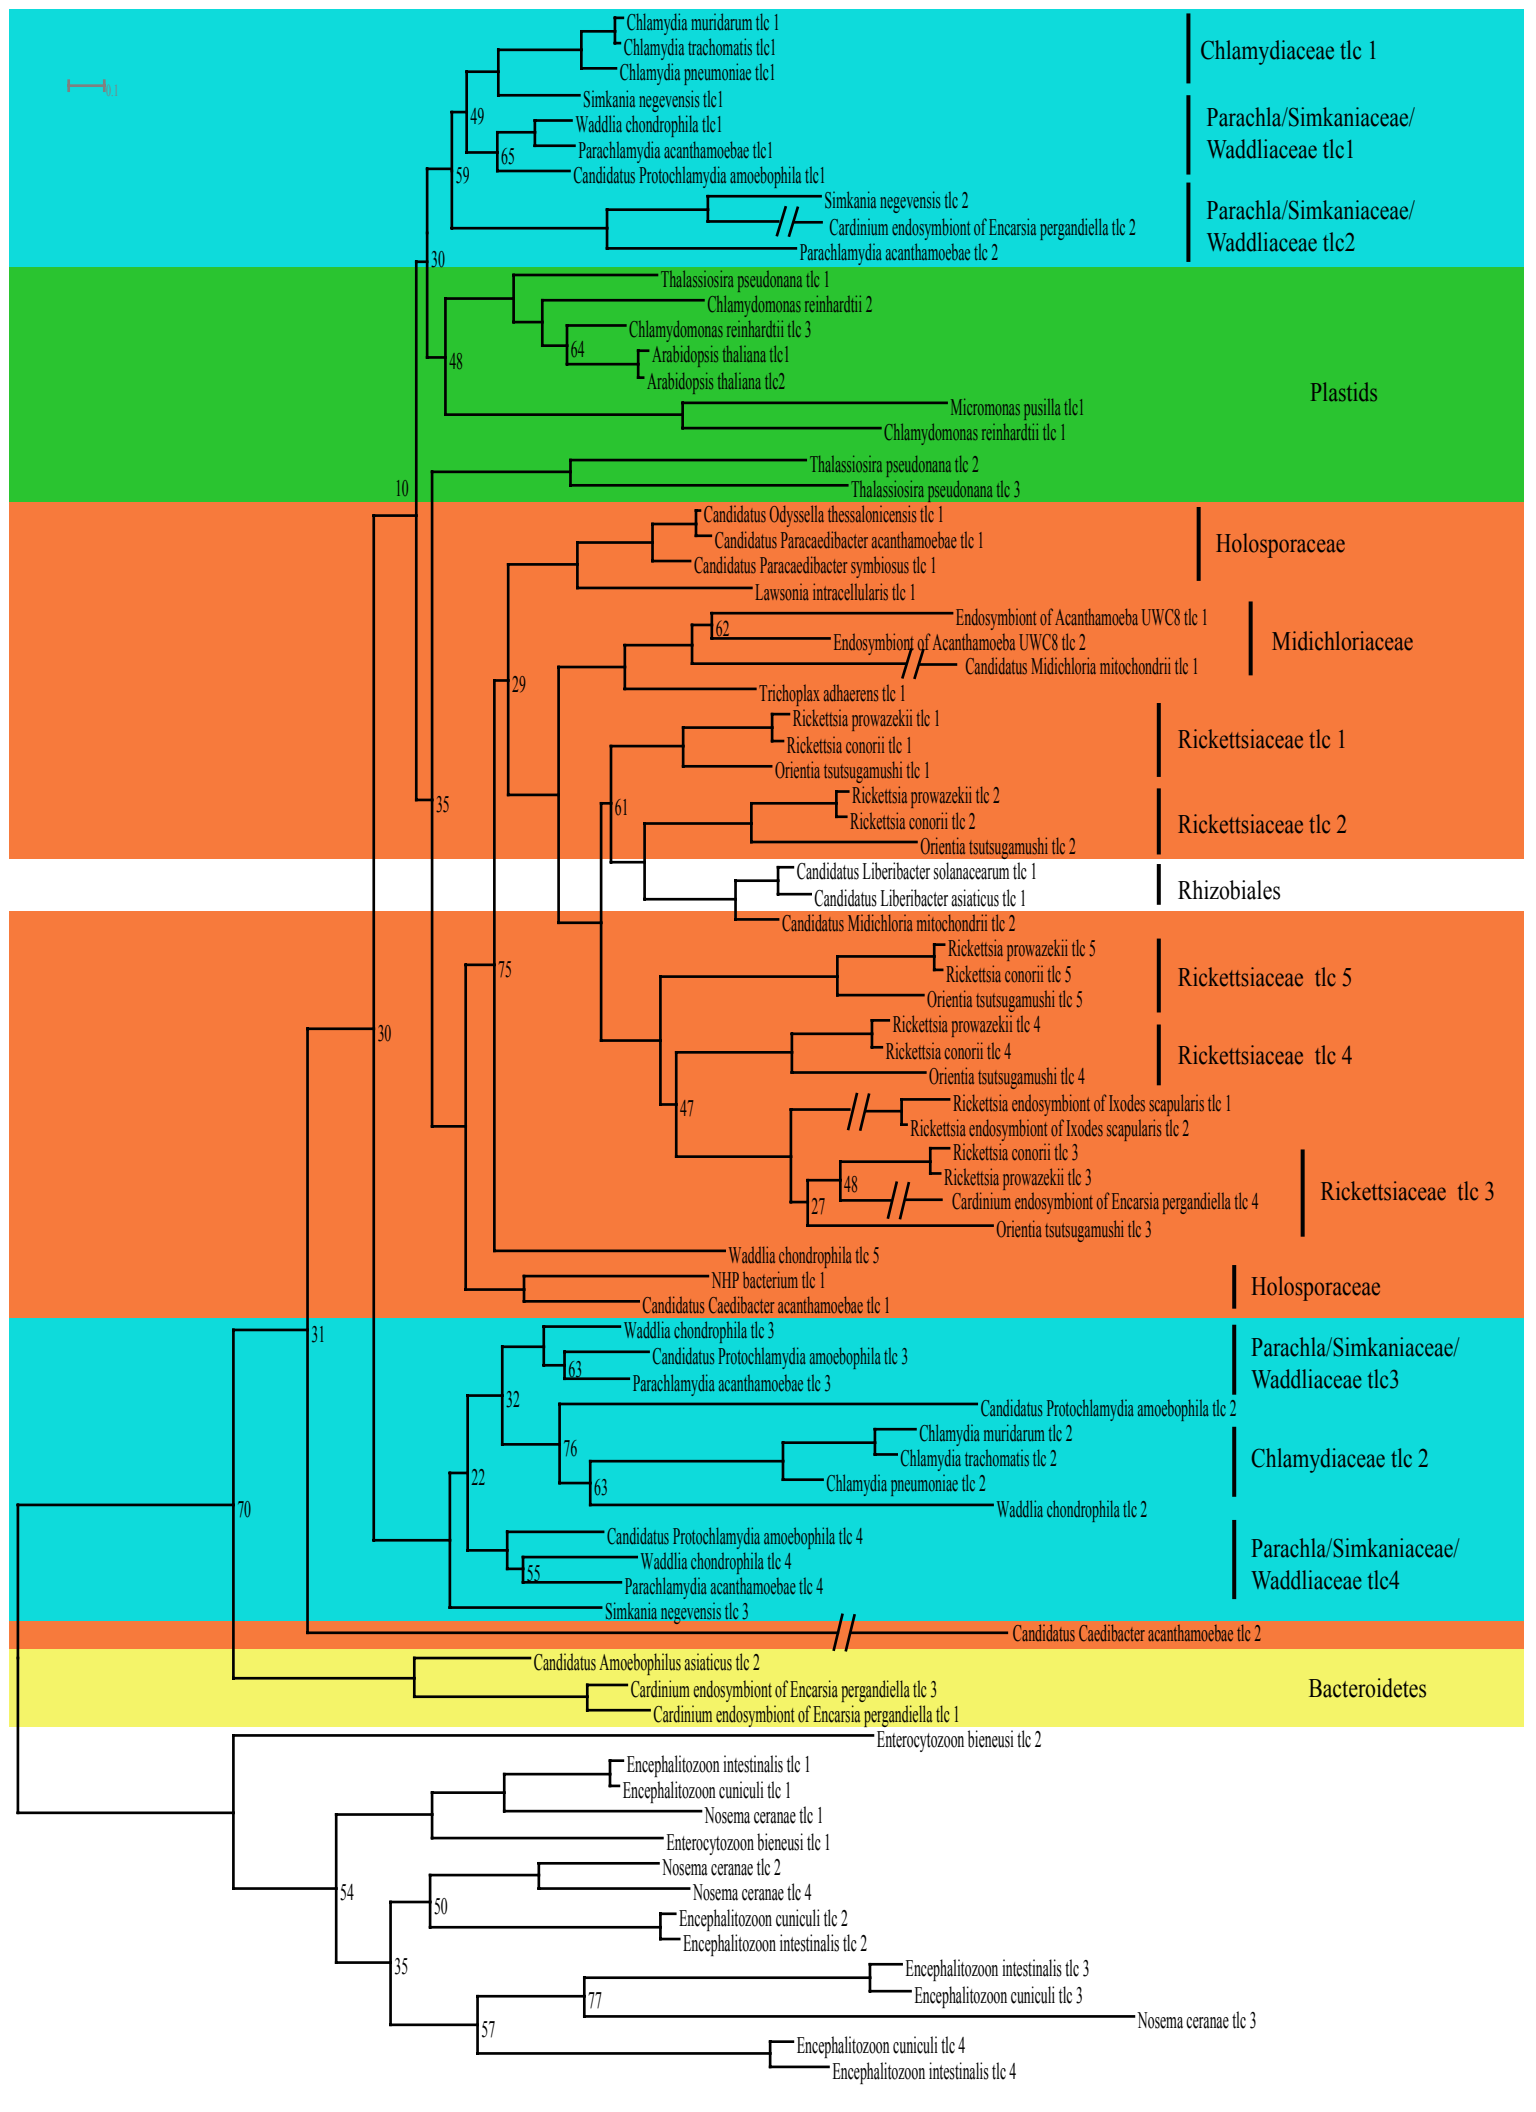

Supplement: pone.0110685.s003.pdf [file pone.0110685.s003.pdf]
